# Supplementary material
Source: publisher figshare collection journal article supplement (https://acs.figshare.com/ndownloader/files/3987763)
Supplement: Supplementary file 1 [file 3987763]

## Supporting Information

### Synthesis and evaluation of the multi-target-directed ligands against

#### Alzheimer's disease based on the fusion of donepezil and ebselen

Zonghua Luo, Jianfei Sheng, Yang Sun, Chuanjun Lu, Jun Yan, Anqiu Liu, Hai-bin Luo, Ling Huang\*, Xingshu Li\*

School of Pharmaceutical Sciences, Sun Yat-sen University, Guangzhou, 510006, China

### Contents

**S2-S4** Experimental procedures for the synthesis of amine intermediates amine (**4a-4e**)

**S4-S17** HPLC and FT-IR spectrum of the target compounds

**S18-S24** Coupled Reductase Assay

**S25-S26** Tables of results for the PAMPA

**S27** References



mmol) in dry THF (5 mL) was added to a suspension of LiAlH<sub>4</sub> (1.0 g, 26.3 mmol) in dry THF (20 mL) at 0 °C, and the mixture was refluxed for 16 h. After cooling to room temperature, 1.0 mL of water was added slowly, and the solution was stirred for 15 min at 0 °C. One millilitre of 15% NaOH was added, the solution was stirred for another 15 min and 3.0 mL water was added. The mixture was filtered and washed with EtOAc and H<sub>2</sub>O. The combined organic layers were dried over Na<sub>2</sub>SO<sub>4</sub> and concentrated, resulting in a colourless oil (**4a**) (1.42 g, 75%) that was used without further purification.

**1-benzylpiperidine-4-carboxamide (s10).**<sup>2</sup> Benzyl bromide (13.0 mL, 110 mmol) was added slowly to a mixture of commercial piperidine-4-carboxamide (**s9**) (12.8 g, 100 mmol), NaHCO<sub>3</sub> (15.12 g, 180 mmol) and toluene (200 mL). The reaction mixture was refluxed for 2 h and filtered after cooling. The residue was dissolved in MeOH and filtered, and the filtrate was evaporated to yield the crude product. The brown solid was crystallised from acetone and MeOH to produce pure product (**s10**) (16.3 g, 75%).

**(1-benzylpiperidin-4-yl)methanamine (4b)** 1-Benzylpiperidine-4-carboxamide (**s10**) (3.27 g, 15 mmol) in dry THF (10 mL) was added to a suspension of LiAlH<sub>4</sub> (1.0 g, 26.3 mmol) in dry THF at 0 °C. The mixture was refluxed for 5 h. In a procedure similar to the production of compound **4a**, compound **4b** was produced as a colourless oil (0.624 g, 67%) that was used without further purification.

**General procedure for the synthesis of amine (4c, 4d, 4e) from an aldehyde or ketone.**<sup>2</sup>

(1) A mixture of K<sub>2</sub>CO<sub>3</sub> (1 eq) and diethyl cyanomethylphosphonate (1.2 eq) in dry THF was stirred at room temperature for 15 min and refluxed for 20 min. After cooling, the aldehyde or ketone (1 eq) was added, and the mixture was refluxed for 12 h. After cooling, a 10% K<sub>2</sub>CO<sub>3</sub> solution was added, and the mixture was extracted with EtOAc. The organic phase was dried over Na<sub>2</sub>SO<sub>4</sub> and evaporated under reduced pressure. The crude product was purified by flash chromatography, and a white solid was obtained.

(2) To a solution of the above product in MeOH, 10% Pt/C was added, filling the hydrogen to 300 psi. The reaction was stirred at room temperature for 10 h. The solution was then filtered, and the filtrate was concentrated to produce a colourless oil, which was used without further purification.

(3) The product from step 2 in dry THF was added to a suspension of LiAlH<sub>4</sub> at 0 °C, and the mixture was stirred at 0 °C for 1 h. In a process similar to the production of compound **3**, the amines were obtained and used without further purification.

**2-(1-benzylpiperidin-4-yl)ethanamine (4c)** Commercial 1-benzyl-4-piperidone was used as the starting reactant to make oil 2-(1-benzylpiperidin-4-yl) ethanamine (**4c**), yield: 61%.

**3-(1-benzylpiperidin-4-yl)propan-1-amine (4d)** Commercial 1-benzyl-4-formylpiperidine was used as the starting reactant to make 3-(1-benzylpiperidin-4-yl)propan-1-amine, yield: 64%.

**4-(1-benzylpiperidin-4-yl)butan-1-amine (4e)** 2-(1-Benzylpiperidin-4-yl) acetaldehyde<sup>3</sup> was used as the starting reactant to make

4-(1-benzylpiperidin-4-yl)butan-1-amine, yield: 56%.

## 2. HPLC and FT-IR spectrum of the target compounds

### 2.1 HPLC spectrum

**5a**

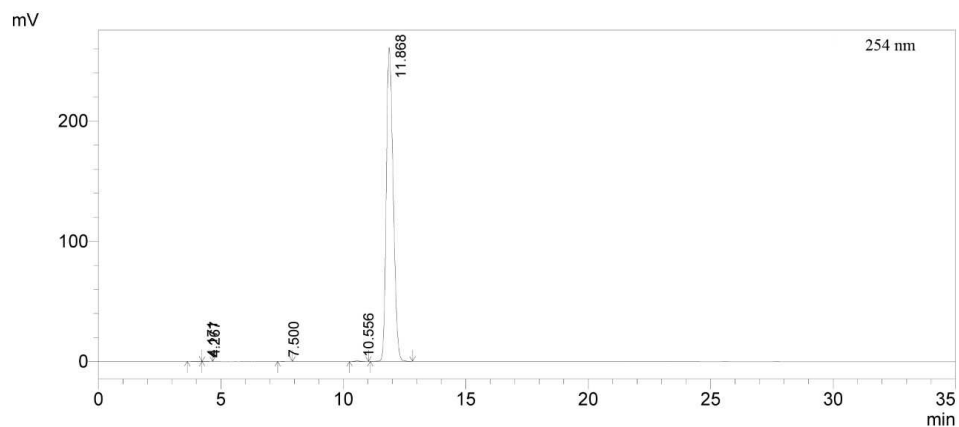

| peak # | retention time | area    | area %  |
|--------|----------------|---------|---------|
| 1      | 4.171          | 4533    | 0.088   |
| 2      | 4.267          | 2666    | 0.052   |
| 3      | 7.500          | 2055    | 0.040   |
| 4      | 10.556         | 8260    | 0.161   |
| 5      | 11.868         | 5119801 | 99.659  |
| total  |                | 5137314 | 100.000 |

**5b**

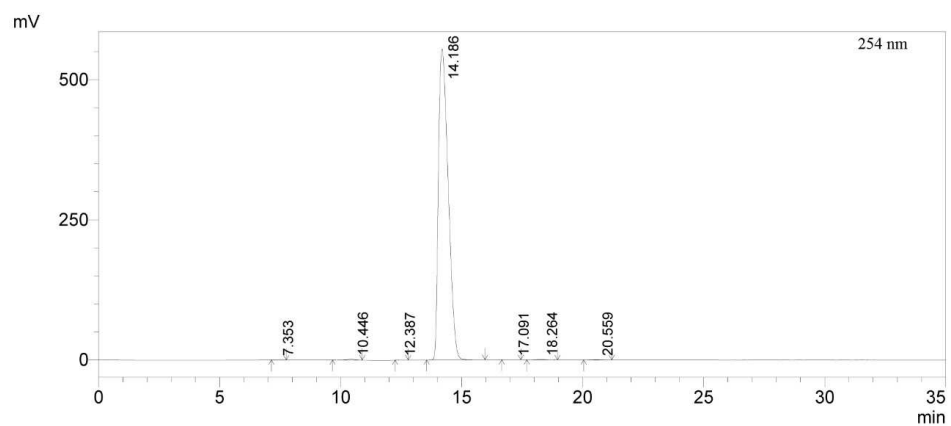

| peak # | retention time | area     | area %  |
|--------|----------------|----------|---------|
| 1      | 7.353          | 2527     | 0.016   |
| 2      | 10.446         | 28632    | 0.183   |
| 3      | 12.387         | 1552     | 0.010   |
| 4      | 14.186         | 15549616 | 99.582  |
| 5      | 17.091         | 3438     | 0.022   |
| 6      | 18.264         | 16570    | 0.106   |
| 7      | 20.559         | 12546    | 0.080   |
| total  |                | 15614881 | 100.000 |

5c

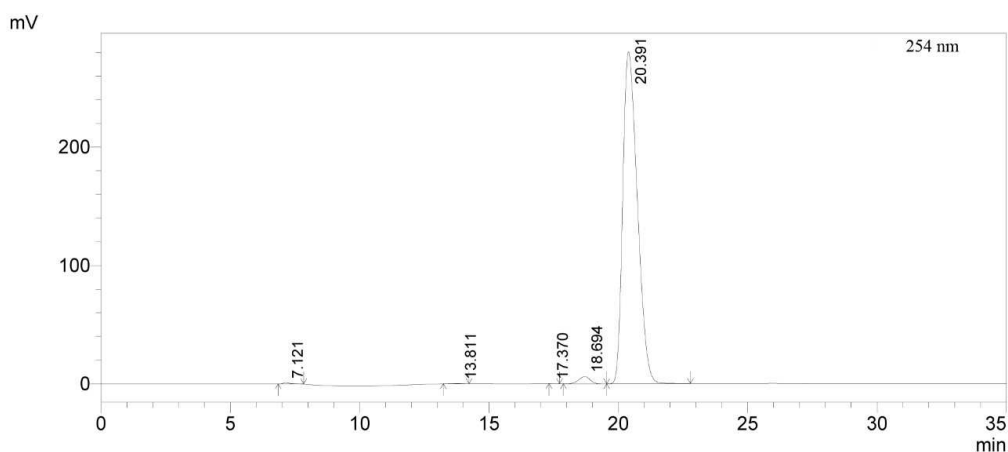

| peak# | retention time | area     | area %  |
|-------|----------------|----------|---------|
| 1     | 7.121          | 16464    | 0.147   |
| 2     | 13.811         | 7391     | 0.066   |
| 3     | 17.370         | 692      | 0.006   |
| 4     | 18.694         | 180496   | 1.615   |
| 5     | 20.391         | 10971566 | 98.165  |
| total |                | 11176609 | 100.000 |

5d

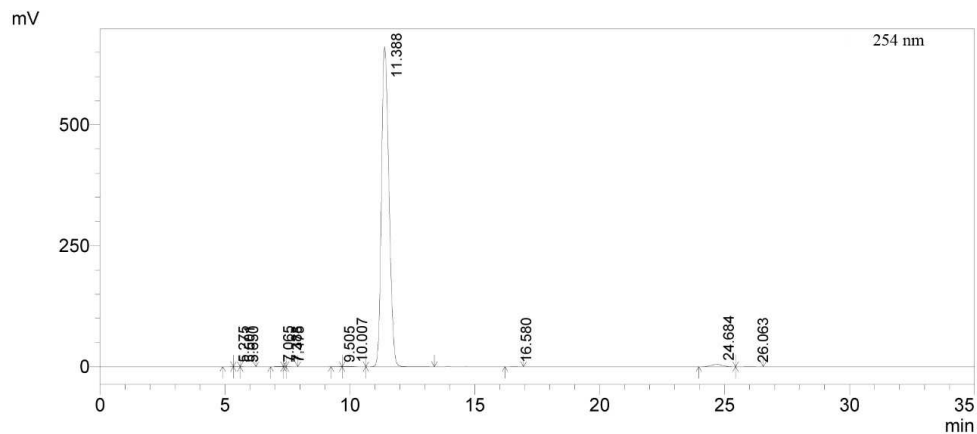

| peak# | retention time | area     | area %  |
|-------|----------------|----------|---------|
| 1     | 5.275          | 2965     | 0.021   |
| 2     | 5.501          | 2923     | 0.021   |
| 3     | 5.650          | 3080     | 0.022   |
| 4     | 7.065          | 9638     | 0.069   |
| 5     | 7.388          | 1182     | 0.008   |
| 6     | 7.475          | 2189     | 0.016   |
| 7     | 9.505          | 3959     | 0.028   |
| 8     | 10.007         | 13544    | 0.097   |
| 9     | 11.388         | 13814367 | 98.613  |
| 10    | 16.580         | 4650     | 0.033   |
| 11    | 24.684         | 143888   | 1.027   |
| 12    | 26.063         | 6215     | 0.044   |
| total |                | 14008600 | 100.000 |

**6a**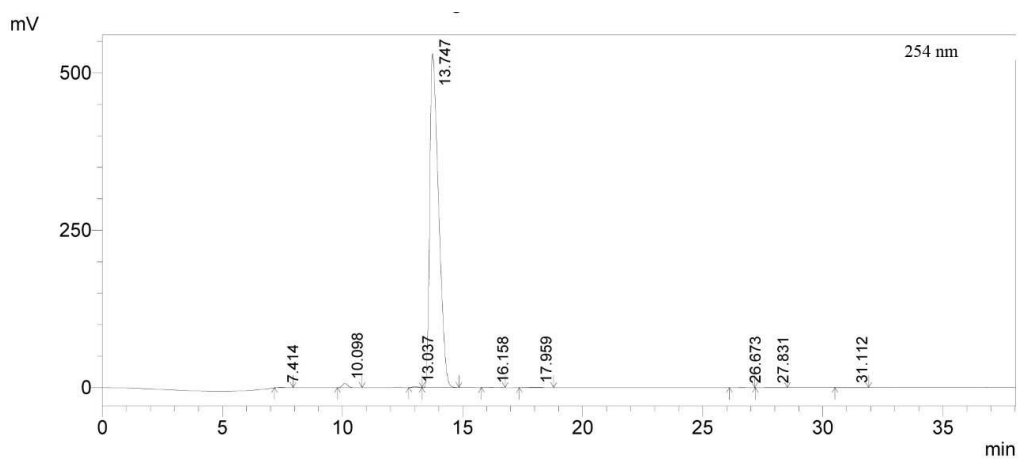

| peak# | retention time | area     | area %  |
|-------|----------------|----------|---------|
| 1     | 7.414          | 8042     | 0.058   |
| 2     | 10.098         | 94358    | 0.686   |
| 3     | 13.037         | 19470    | 0.142   |
| 4     | 13.747         | 13597137 | 98.904  |
| 5     | 16.158         | 4952     | 0.036   |
| 6     | 17.959         | 8191     | 0.060   |
| 7     | 26.673         | 2953     | 0.021   |
| 8     | 27.831         | 4372     | 0.032   |
| 9     | 31.112         | 8358     | 0.061   |
| total |                | 13747833 | 100.000 |

**6b**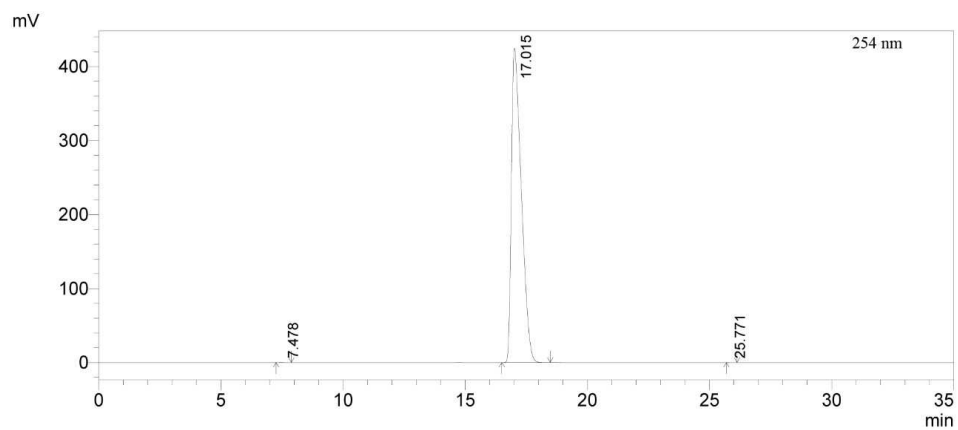

| peak# | retention time | area     | area %  |
|-------|----------------|----------|---------|
| 1     | 7.478          | 2446     | 0.020   |
| 2     | 17.015         | 11983005 | 99.965  |
| 3     | 25.771         | 1730     | 0.014   |
| total |                | 11987180 | 100.000 |

**6c**  
mV

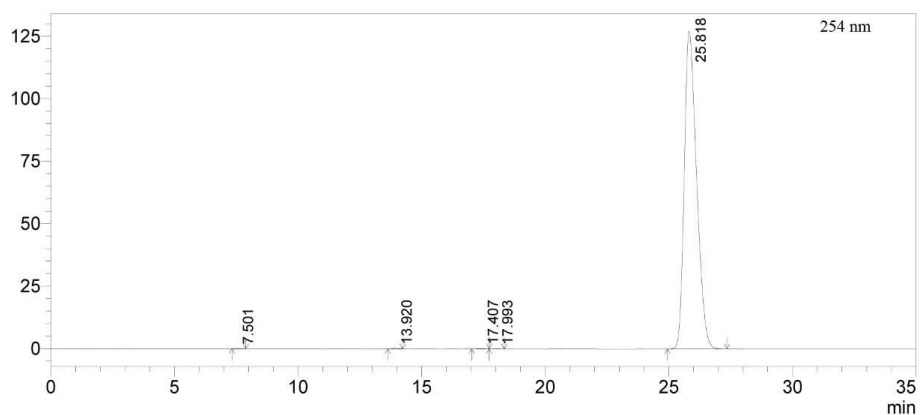

| peak # | retention time | area    | area %  |
|--------|----------------|---------|---------|
| 1      | 7.501          | 2271    | 0.052   |
| 2      | 13.920         | 3006    | 0.068   |
| 3      | 17.407         | 3225    | 0.073   |
| 4      | 17.993         | 2294    | 0.052   |
| 5      | 25.818         | 4396982 | 99.755  |
| total  |                | 4407777 | 100.000 |

**6d**  
mV

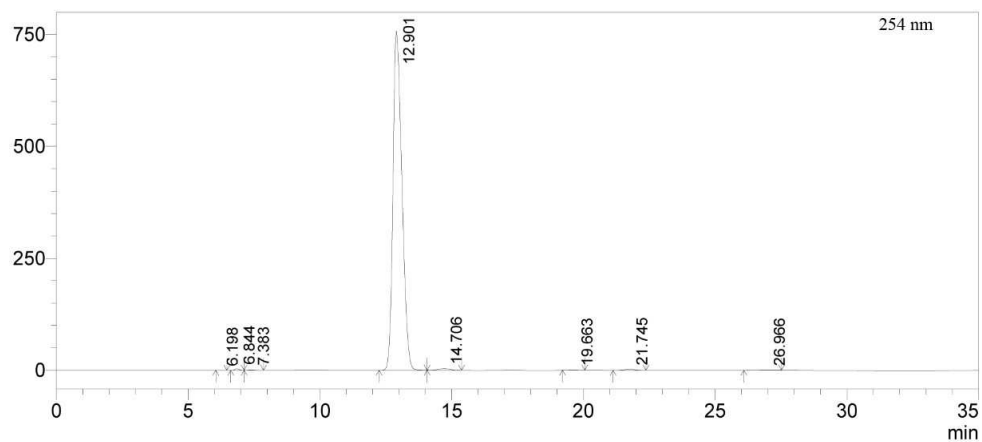

| peak # | retention time | area     | area %  |
|--------|----------------|----------|---------|
| 1      | 6.198          | 1462     | 0.008   |
| 2      | 6.844          | 33855    | 0.187   |
| 3      | 7.383          | 12794    | 0.071   |
| 4      | 12.901         | 17904688 | 98.761  |
| 5      | 14.706         | 103394   | 0.570   |
| 6      | 19.663         | 8614     | 0.048   |
| 7      | 21.745         | 48330    | 0.267   |
| 8      | 26.966         | 16169    | 0.089   |
| total  |                | 18129305 | 100.000 |

**7a**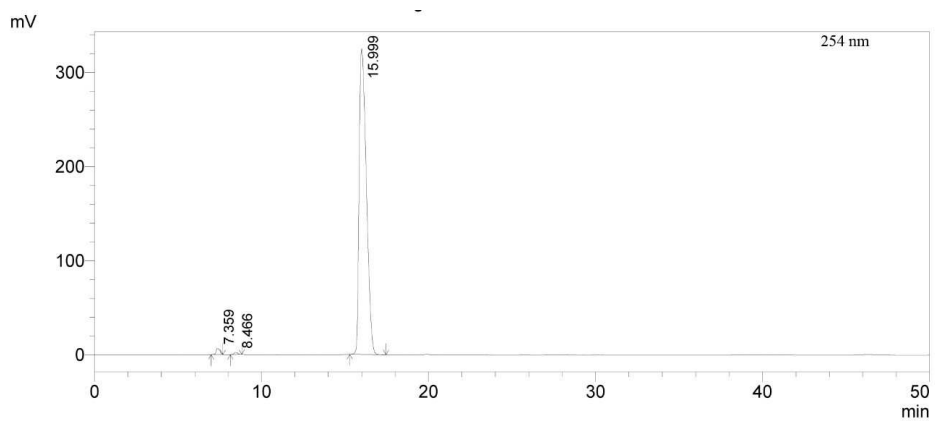

| peak# | retention time | area    | area %  |
|-------|----------------|---------|---------|
| 1     | 7.359          | 101580  | 1.025   |
| 2     | 8.466          | 35899   | 0.362   |
| 3     | 15.999         | 9776487 | 98.613  |
| total |                | 9913966 | 100.000 |

**7b**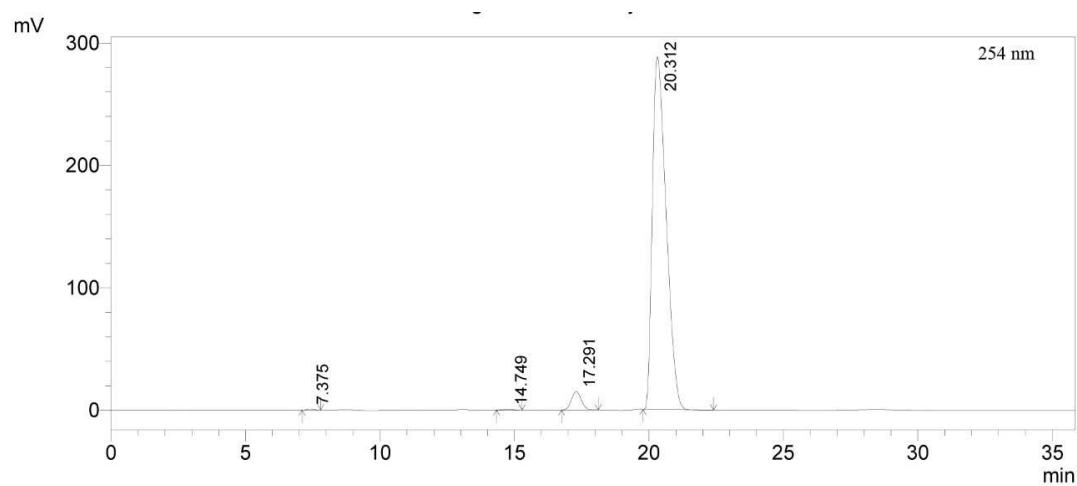

| peak# | retention time | area     | area %  |
|-------|----------------|----------|---------|
| 1     | 7.375          | 14795    | 0.139   |
| 2     | 14.749         | 11557    | 0.108   |
| 3     | 17.291         | 386300   | 3.619   |
| 4     | 20.312         | 10262837 | 96.135  |
| total |                | 10675490 | 100.000 |



7d

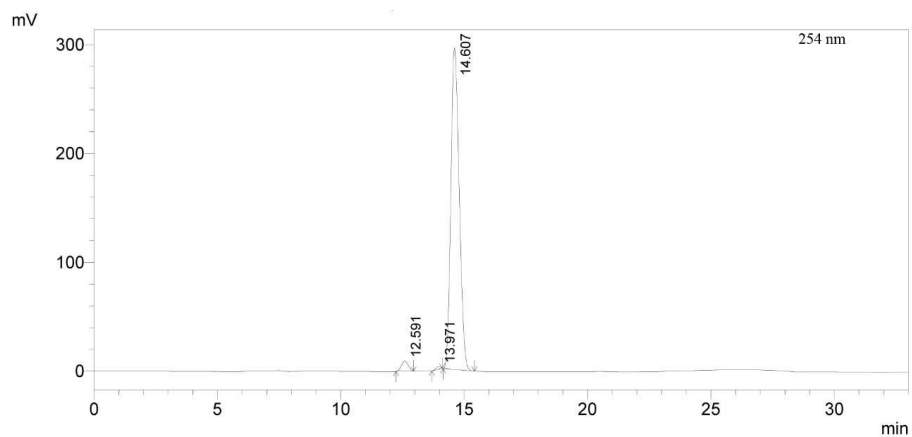

| peak# | retention time | area    | area %  |
|-------|----------------|---------|---------|
| 1     | 12.591         | 179211  | 2.501   |
| 2     | 13.971         | 30754   | 0.429   |
| 3     | 14.607         | 6956598 | 97.070  |
| total |                | 7166564 | 100.000 |

8

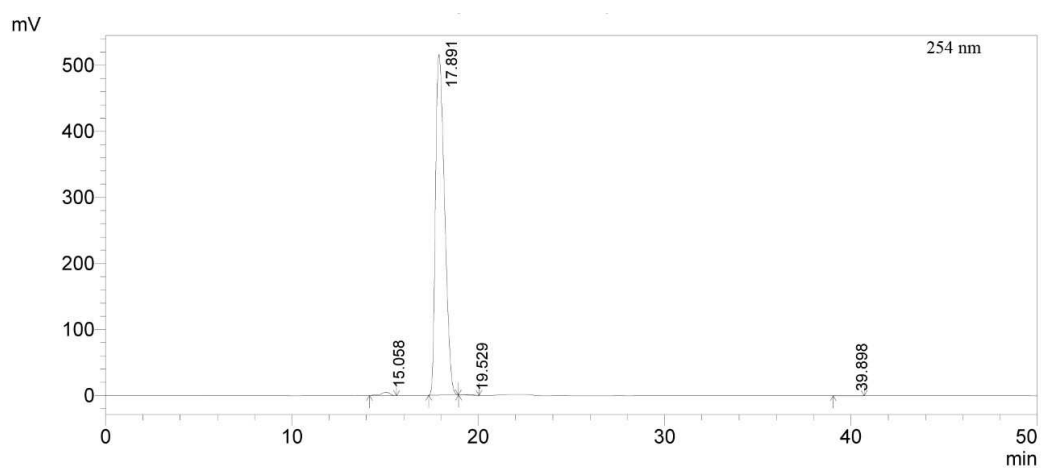

| peak# | retention time | area     | area %  |
|-------|----------------|----------|---------|
| 1     | 15.058         | 166413   | 0.943   |
| 2     | 17.891         | 17442648 | 98.855  |
| 3     | 19.529         | 19136    | 0.108   |
| 4     | 39.898         | 16456    | 0.093   |
| total |                | 17644653 | 100.000 |

9

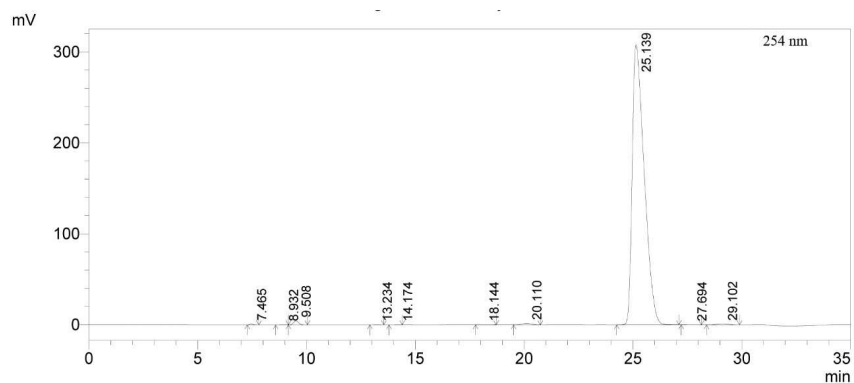

| peak# | retention time | area     | area %  |
|-------|----------------|----------|---------|
| 1     | 7.465          | 8305     | 0.070   |
| 2     | 8.932          | 2272     | 0.019   |
| 3     | 9.508          | 68808    | 0.576   |
| 4     | 13.234         | 2799     | 0.023   |
| 5     | 14.174         | 1753     | 0.015   |
| 6     | 18.144         | 5694     | 0.048   |
| 7     | 20.110         | 48154    | 0.403   |
| 8     | 25.139         | 11758557 | 98.501  |
| 9     | 27.694         | 4674     | 0.039   |
| 10    | 29.102         | 36516    | 0.306   |
| total |                | 11937532 | 100.000 |

## 2.2. FT-IR spectrum

5a

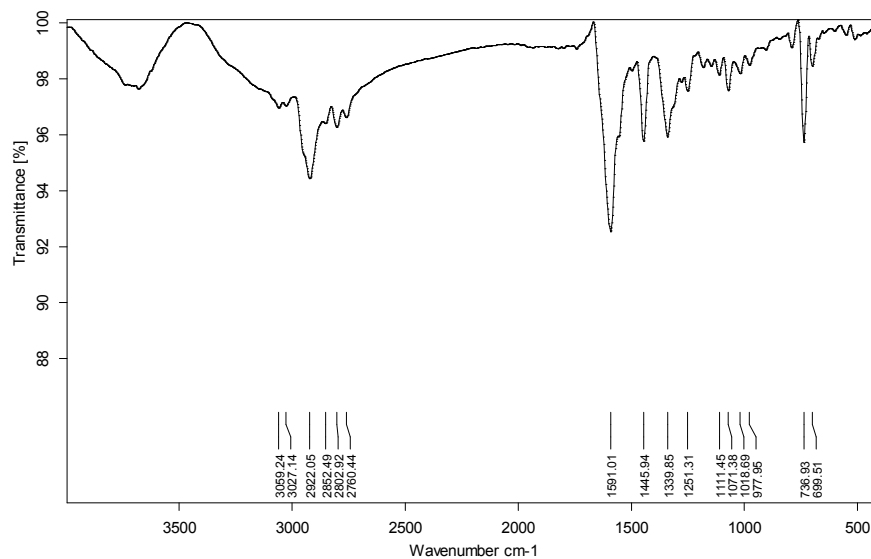

D:\luozonghua\373-3-2.0

固体

28/03/2013

5b

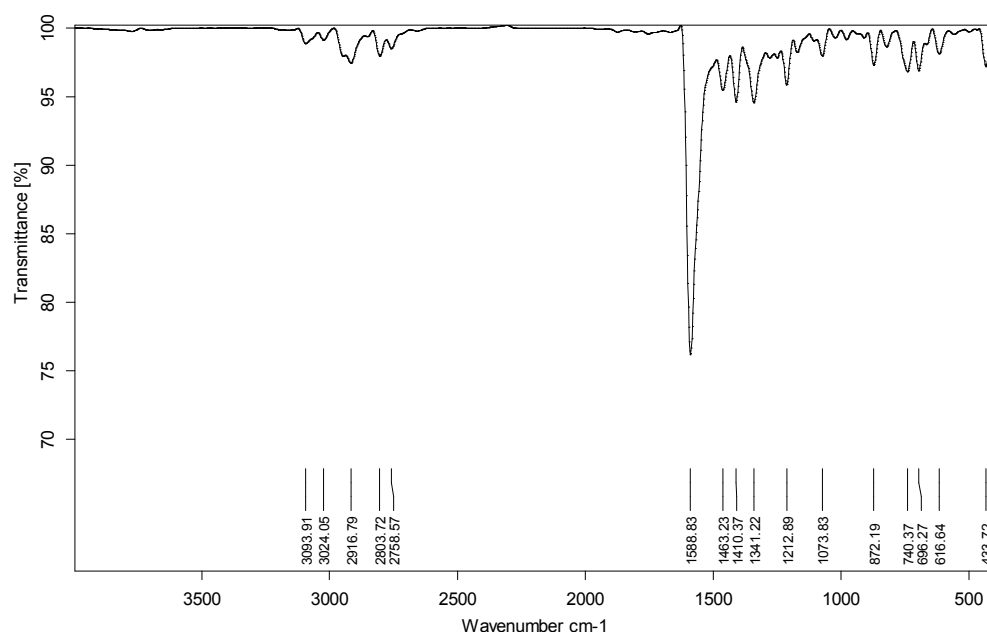

|                      |    |            |
|----------------------|----|------------|
| D:\luozonghua\32-2.0 | 固体 | 28/03/2013 |
|----------------------|----|------------|

Page 1/1

5c

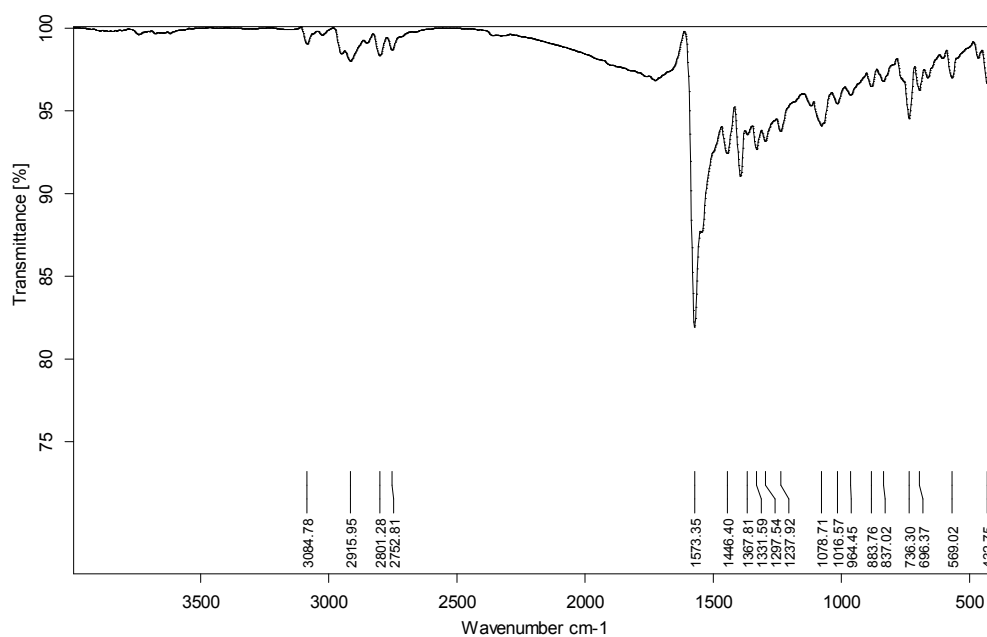

|                    |    |            |
|--------------------|----|------------|
| D:\luozonghua\43.0 | 固体 | 28/03/2013 |
|--------------------|----|------------|

Page 1/1

5d

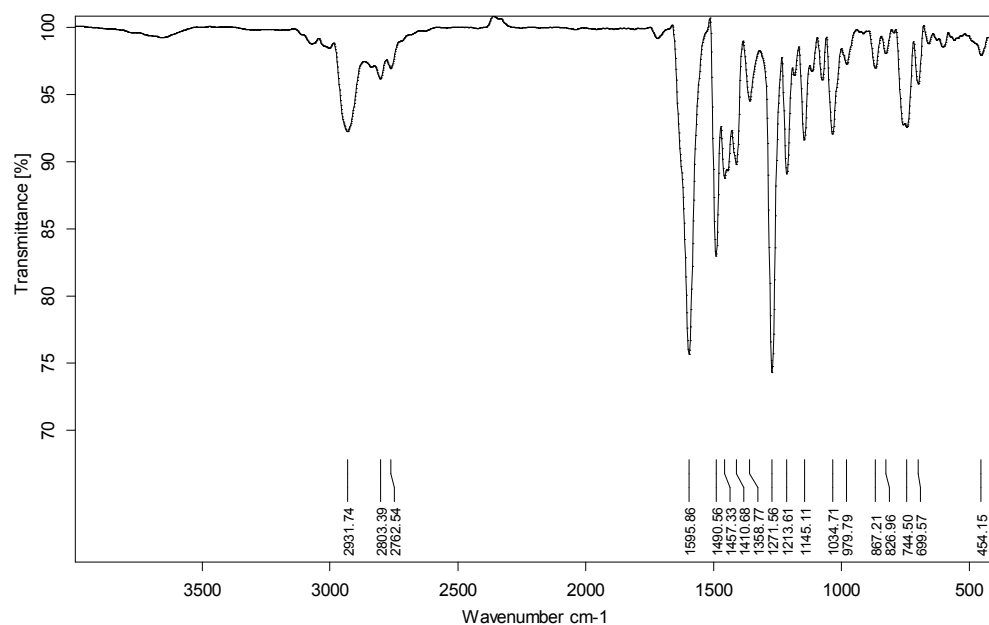

D:\luozonghua\387-1.0

固体

28/03/2013

Page 1/1

6a

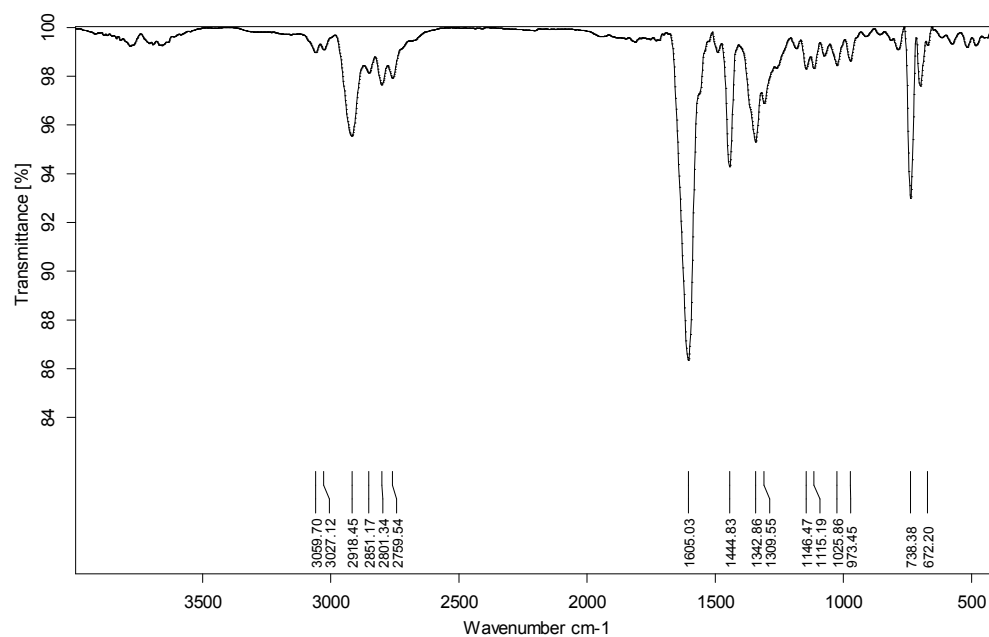

D:\luozonghua\378-2.0

固体

28/03/2013

Page 1/1

6b

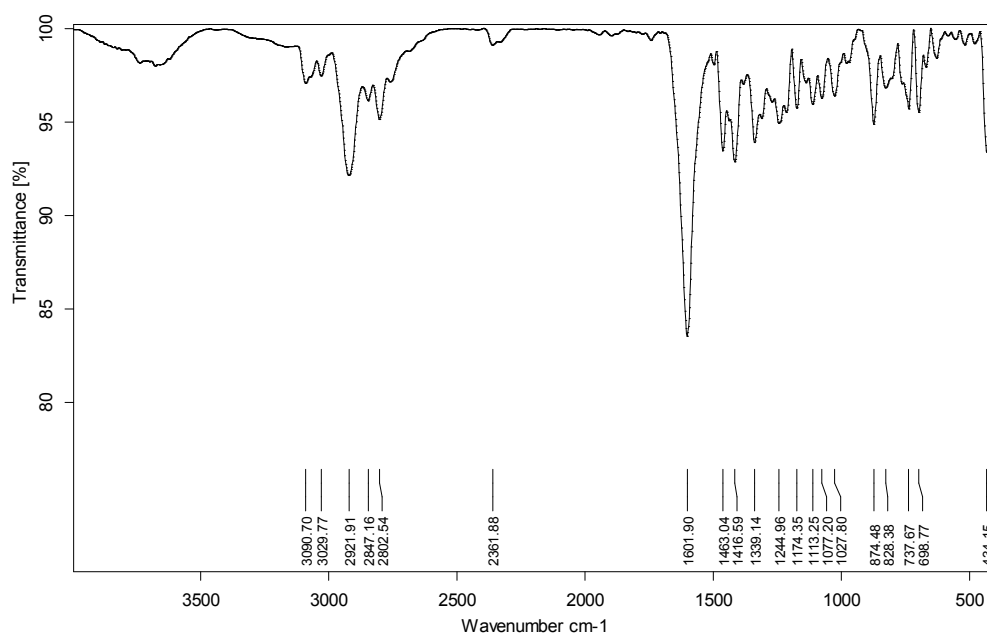

D:\luozonghua\33.0

固体

28/03/2013

Page 1/1

6c

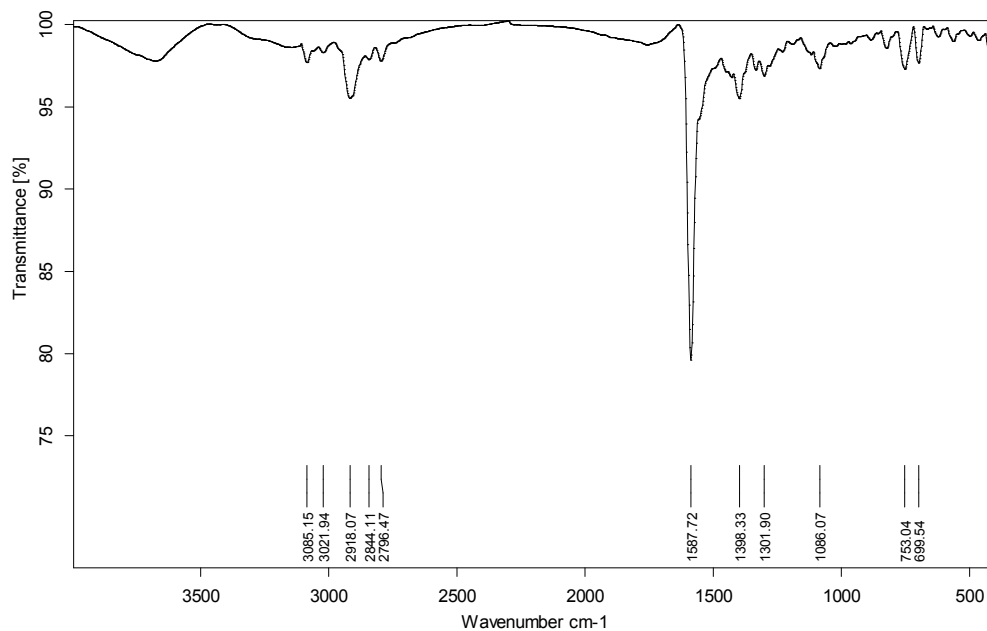

D:\luozonghua\35.0

固体

28/03/2013

Page 1/1

6d

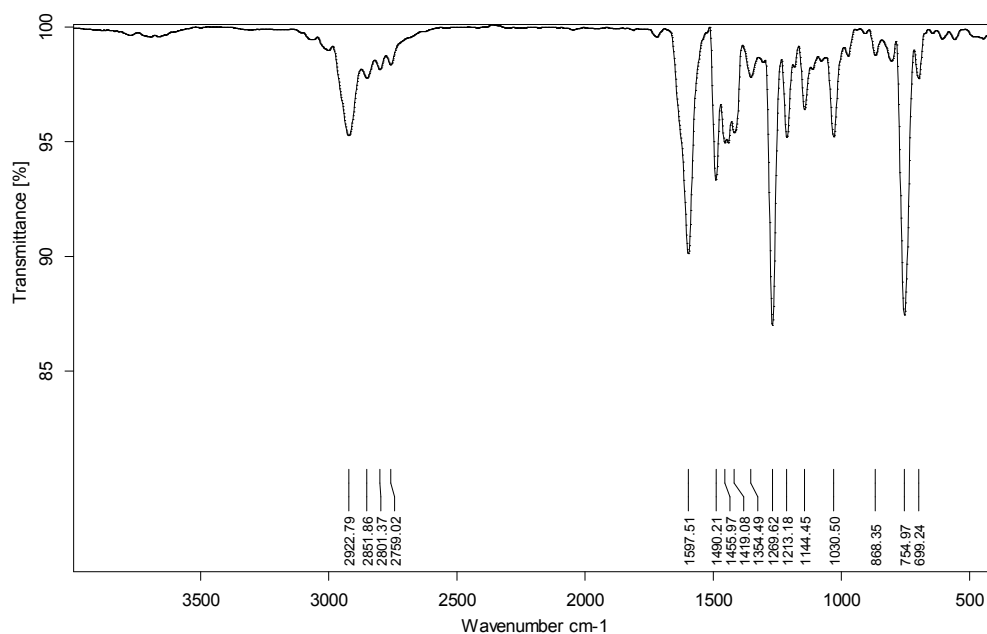

D:\luozonghua\387-2.0

固体

28/03/2013

Page 1/1

7a

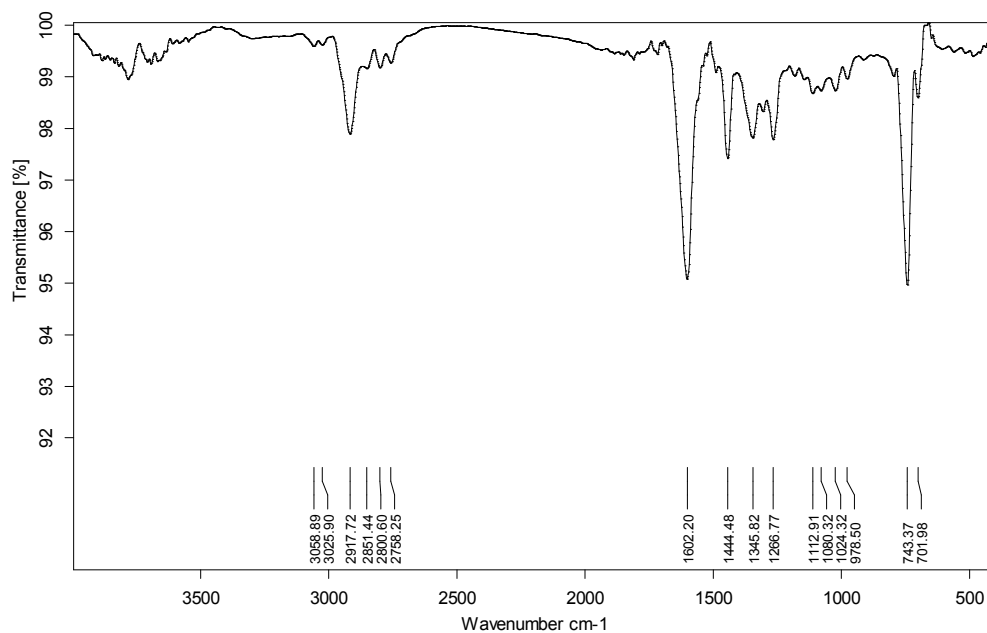

D:\luozonghua\379.0

固体

28/03/2013

Page 1/1

7b

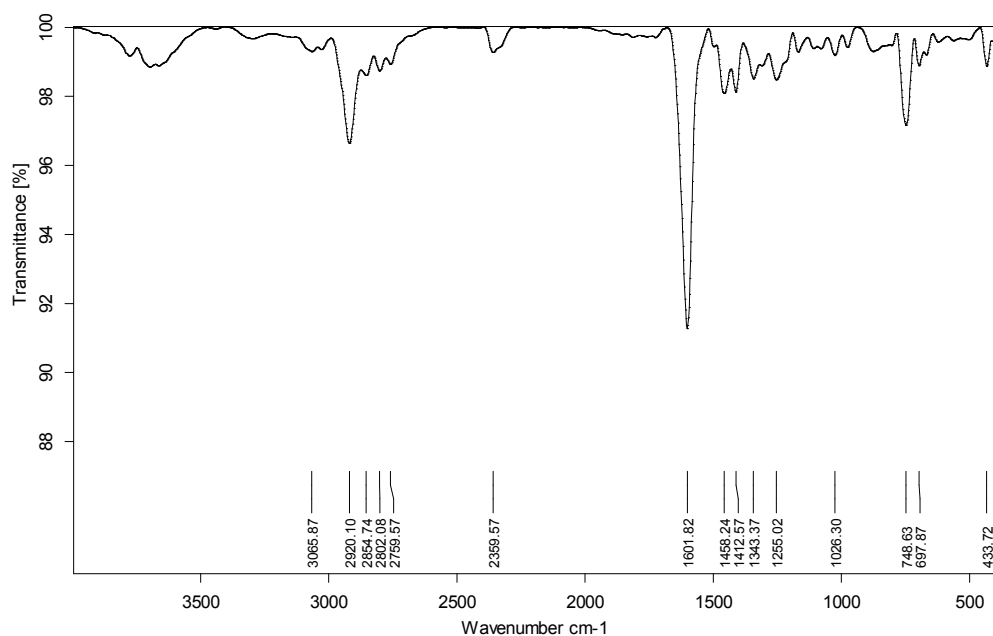

|                    |    |            |
|--------------------|----|------------|
| D:\luozonghua\30.0 | 固体 | 28/03/2013 |
|--------------------|----|------------|

Page 1/1

7c

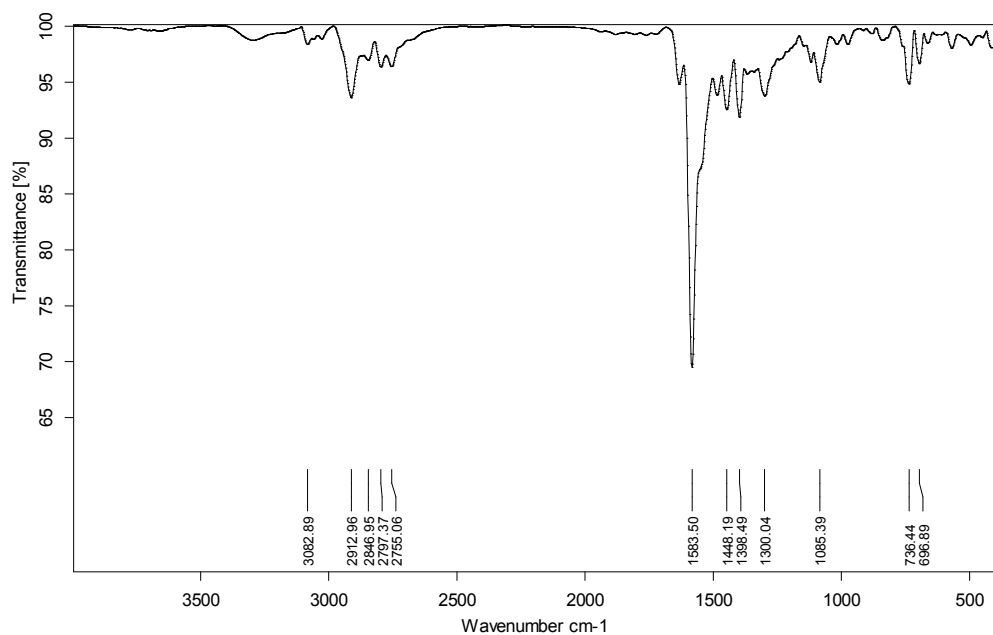

|                    |    |            |
|--------------------|----|------------|
| D:\luozonghua\36.0 | 固体 | 28/03/2013 |
|--------------------|----|------------|

Page 1/1

7d

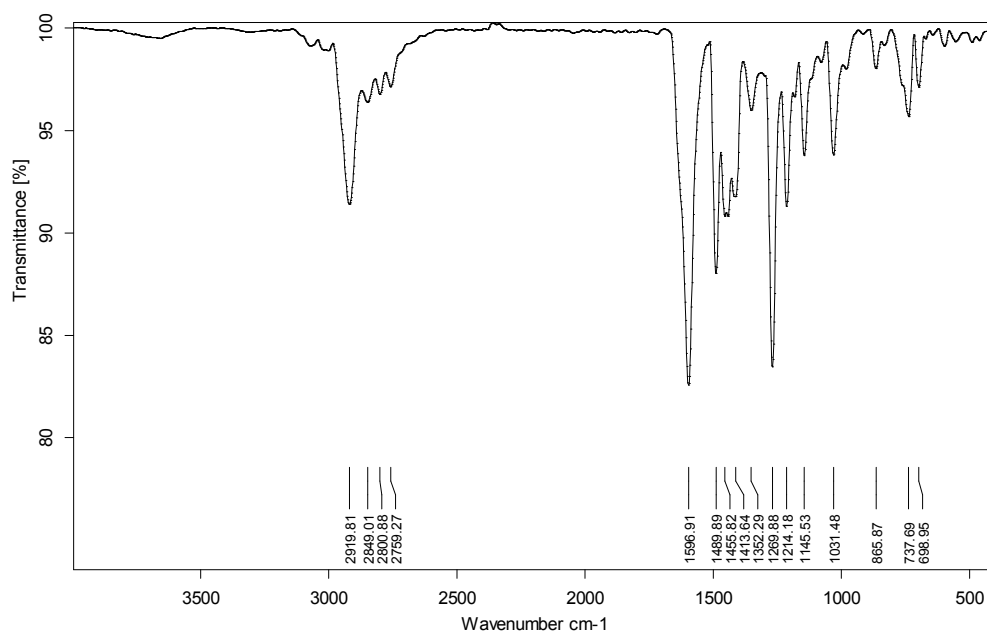

D:\luozonghua\381.0

固体

28/03/2013

Page 1/1

8

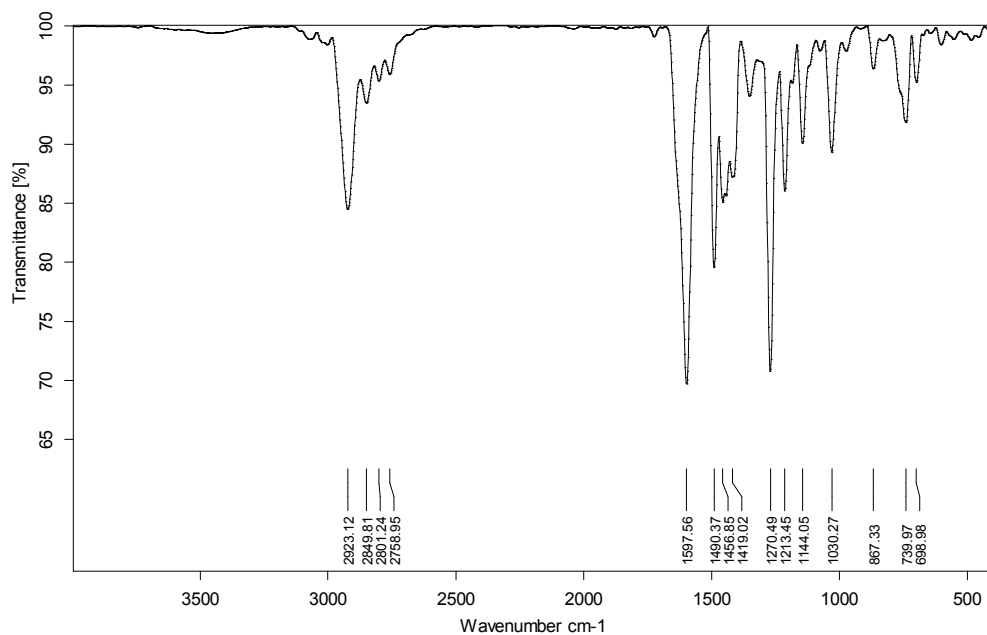

D:\luozonghua\44.0

固体

28/03/2013

Page 1/1



9

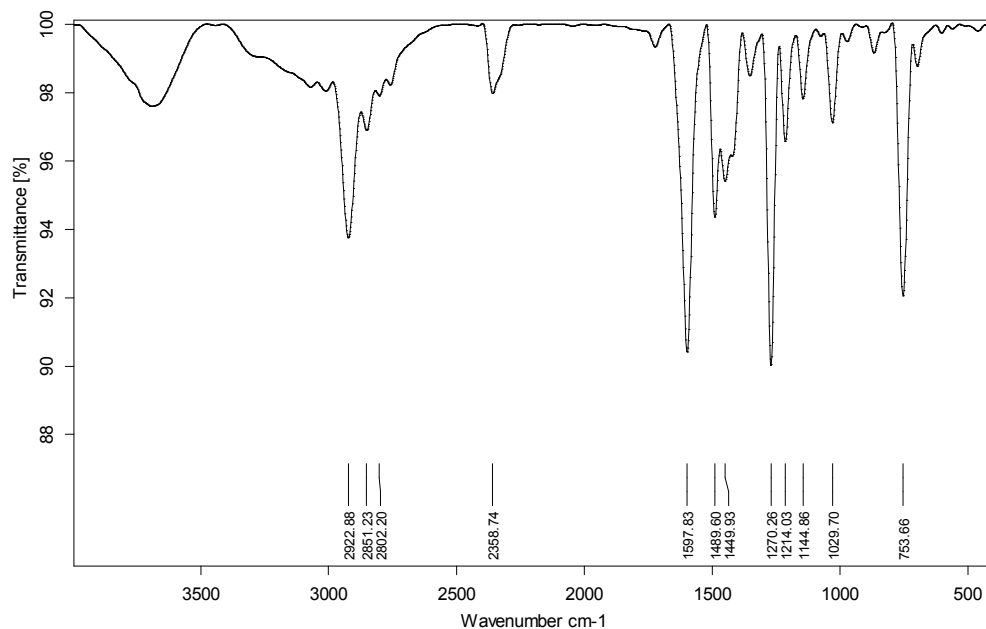

D:\luozonghua\24-3.0

固体

28/03/2013

Page 1/1

10

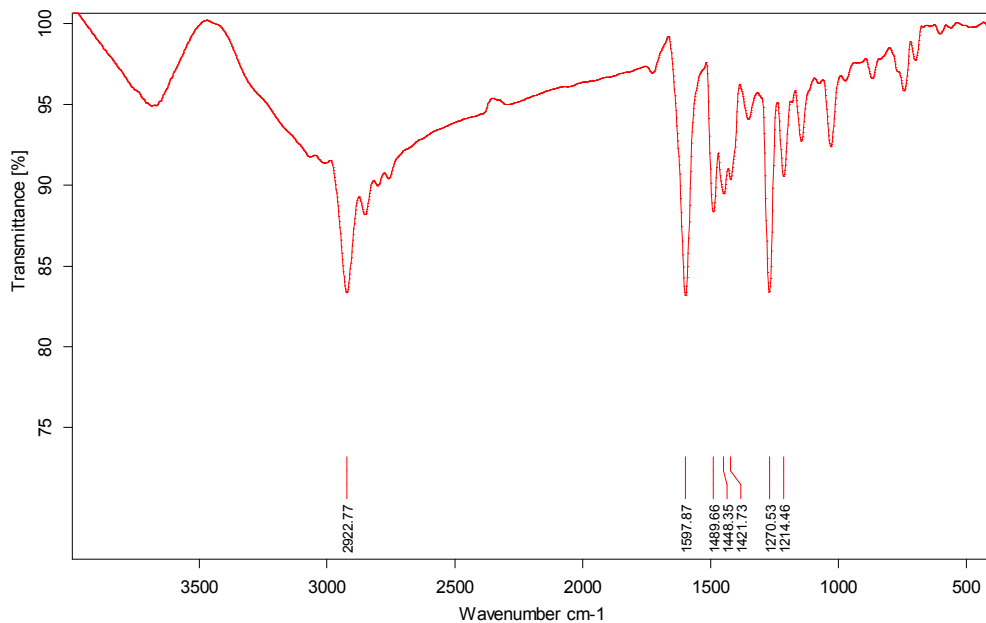

D:\luozonghua\24-2.0

固体

28/03/2013

Page 1/1

### 3. Coupled Reductase Assay

**Procedure:** Phosphate buffer solution of pH 7.5 was taken in 1 mL cuvette. GSH(2 mM), NADPH(0.4 mM), GR(1.3 U/mL) were added into cuvette contained buffer solution. Finally, H<sub>2</sub>O<sub>2</sub>(1.6 mM) was added to initiate the reaction in a cuvette having mixture of all and immediately start the experiment for the control values in absence of any catalyst. For the test samples(80  $\mu$ M), solution was made in MeOH and added into cuvette containing the mixture of buffer solution, GSH, NADPH and GR. Now, H<sub>2</sub>O<sub>2</sub> was added to initiate the reaction.

**Table S1.** Control values (in the absence of the catalyst) in the coupled reductase assay. Catalyzed reduction of H<sub>2</sub>O<sub>2</sub> by GSH: GSH (2 mM), NADPH (0.4 mM), GR (1.3 unit/mL), and H<sub>2</sub>O<sub>2</sub> (1.6 mM), at pH 7.5 in MeOH.

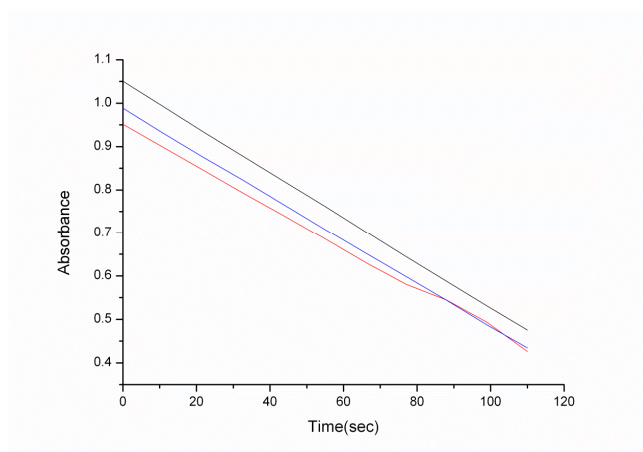

| Sr. No. | $\Delta A$ | $\Delta A/\text{min}$ | $v_0(\mu\text{M}\cdot\text{min}^{-1})$ | $v_0(\mu\text{M}\cdot\text{min}^{-1})$ |
|---------|------------|-----------------------|----------------------------------------|----------------------------------------|
| 1       | 0.0583     | 0.318                 | 51.1254                                |                                        |
| 2       | 0.053      | 0.289091              | 46.47764                               | 49.5 $\pm$ 2.6                         |
| 3       | 0.0579     | 0.315818              | 50.77463                               |                                        |

**Table S2.** Reduction rate ( $v_0$ ) of **7d** in the coupled reductase assay in the coupled reductase assay. Catalyzed reduction of  $\text{H}_2\text{O}_2$  by GSH: GSH (2 mM), NADPH (0.4 mM), GR (1.3 unit/mL),  $\text{H}_2\text{O}_2$  (1.6 mM) and **7d** (80  $\mu\text{M}$ ) , at pH 7.5 in MeOH.

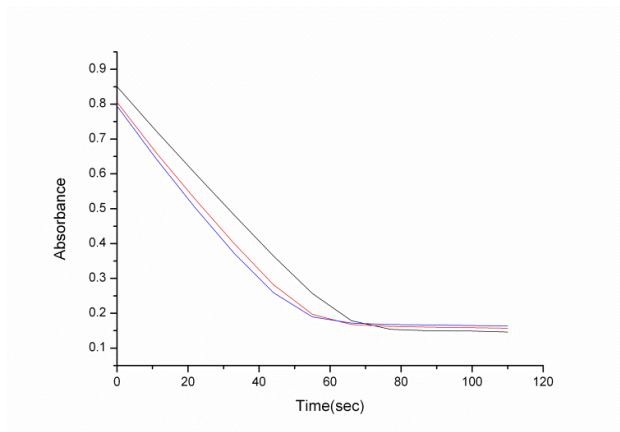

| Sr. No. | $\Delta A$ | $\Delta A/\text{min}$ | $v_0(\mu\text{M}\cdot\text{min}^{-1})$ | $v_0(\mu\text{M}\cdot\text{min}^{-1})$ |
|---------|------------|-----------------------|----------------------------------------|----------------------------------------|
| 1       | 0.1270     | 0.6930                | 111.37                                 |                                        |
| 2       | 0.1445     | 0.7882                | 126.7173                               | 123.5 $\pm$ 10.9                       |
| 3       | 0.1510     | 0.8236                | 132.4174                               |                                        |

**Table S3.** Reduction rate ( $v_0$ ) of **8** in the coupled reductase assay in the coupled reductase assay. Catalyzed reduction of  $\text{H}_2\text{O}_2$  by GSH: GSH (2 mM), NADPH (0.4 mM), GR (1.3 unit/mL),  $\text{H}_2\text{O}_2$  (1.6 mM) and **8**(80  $\mu\text{M}$ ), at pH 7.5 in MeOH.

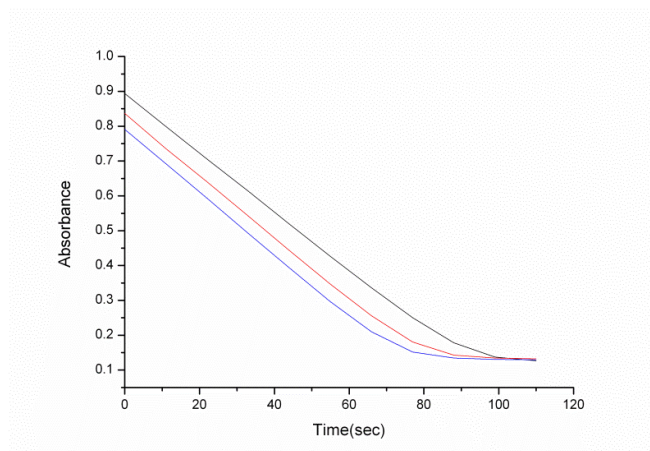

| Sr. No. | $\Delta A$ | $\Delta A/\text{min}$ | $v_0(\mu\text{M}\cdot\text{min}^{-1})$ | $v_0(\mu\text{M}\cdot\text{min}^{-1})$ |
|---------|------------|-----------------------|----------------------------------------|----------------------------------------|
| 1       | 0.0944     | 0.514909              | 82.78281                               | 86.1 $\pm$ 3.0                         |
| 2       | 0.1011     | 0.551455              | 88.65829                               |                                        |
| 3       | 0.0989     | 0.539455              | 86.72903                               |                                        |

**Table S4.** Reduction rate ( $v_0$ ) of **9** in the coupled reductase assay in the coupled reductase assay. Catalyzed reduction of  $\text{H}_2\text{O}_2$  by GSH: GSH (2 mM), NADPH (0.4 mM), GR (1.3 unit/mL),  $\text{H}_2\text{O}_2$  (1.6 mM) and **9**(80  $\mu\text{M}$ ) , at pH 7.5 in MeOH.

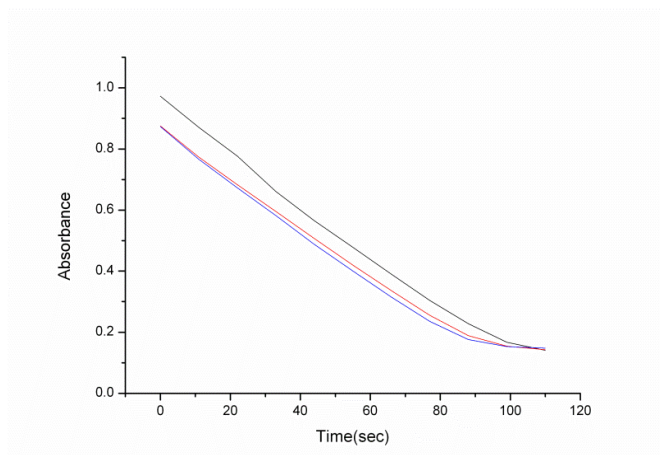

| Sr. No. | $\Delta A$ | $\Delta A/\text{min}$ | $v_0(\mu\text{M}\cdot\text{min}^{-1})$ | $v_0(\mu\text{M}\cdot\text{min}^{-1})$ |
|---------|------------|-----------------------|----------------------------------------|----------------------------------------|
| 1       | 0.0876     | 0.477818              | 76.81964                               |                                        |
| 2       | 0.0935     | 0.51                  | 81.99357                               | 80.1 $\pm$ 2.8                         |
| 3       | 0.0929     | 0.506727              | 81.46741                               |                                        |

**Table S5.** Reduction rate ( $v_0$ ) of **10** in the coupled reductase assay in the coupled reductase assay. Catalyzed reduction of  $\text{H}_2\text{O}_2$  by GSH: GSH (2 mM), NADPH (0.4 mM), GR (1.3 unit/mL),  $\text{H}_2\text{O}_2$  (1.6 mM) and **10** (80  $\mu\text{M}$ ), at pH 7.5 in MeOH.

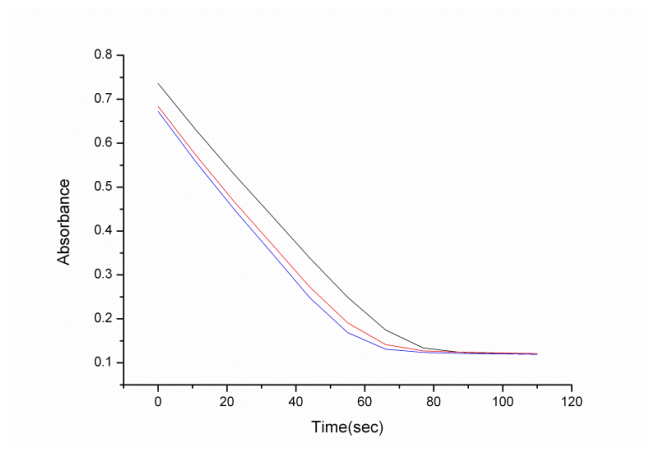

| Sr. No. | $\Delta A$ | $\Delta A/\text{min}$ | $v_0(\mu\text{M}\cdot\text{min}^{-1})$ | $v_0(\mu\text{M}\cdot\text{min}^{-1})$ |
|---------|------------|-----------------------|----------------------------------------|----------------------------------------|
| 1       | 0.1055     | 0.575455              | 92.51681                               | 97.1 $\pm$ 4.3                         |
| 2       | 0.1115     | 0.608182              | 97.77843                               |                                        |
| 3       | 0.1152     | 0.628364              | 101.0231                               |                                        |

**Table S6.** Reduction rate ( $v_0$ ) of ebselen in the coupled reductase assay in the coupled reductase assay. Catalyzed reduction of  $\text{H}_2\text{O}_2$  by GSH: GSH (2 mM), NADPH (0.4 mM), GR (1.3 unit/mL),  $\text{H}_2\text{O}_2$  (1.6 mM) and ebselen (80  $\mu\text{M}$ ) , at pH 7.5 in MeOH.

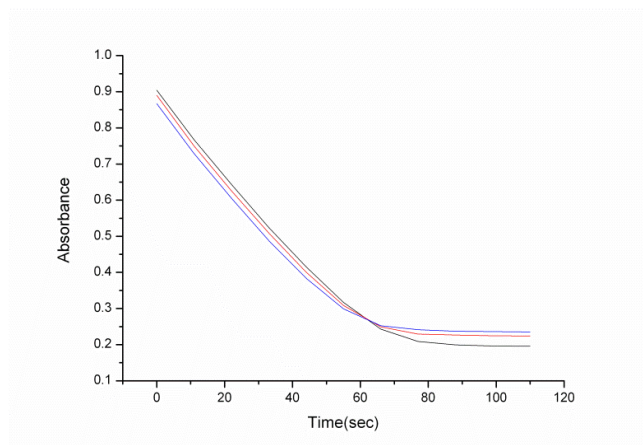

| Sr. No. | $\Delta A$ | $\Delta A/\text{min}$ | $v_0(\mu\text{M}\cdot\text{min}^{-1})$ | $v_0(\mu\text{M}\cdot\text{min}^{-1})$ |
|---------|------------|-----------------------|----------------------------------------|----------------------------------------|
| 1       | 0.1372     | 0.748364              | 120.3157                               | 121.3 $\pm$ 1.1                        |
| 2       | 0.1397     | 0.762                 | 122.508                                |                                        |
| 3       | 0.1382     | 0.753818              | 121.1926                               |                                        |

**Table S7.** Reduction rate ( $v_0$ ) of donepezil in the coupled reductase assay in the coupled reductase assay. Catalyzed reduction of  $\text{H}_2\text{O}_2$  by GSH: GSH (2 mM), NADPH (0.4 mM), GR (1.3 unit/mL),  $\text{H}_2\text{O}_2$  (1.6 mM) and donepezil (80  $\mu\text{M}$ ) , at pH 7.5 in MeOH.

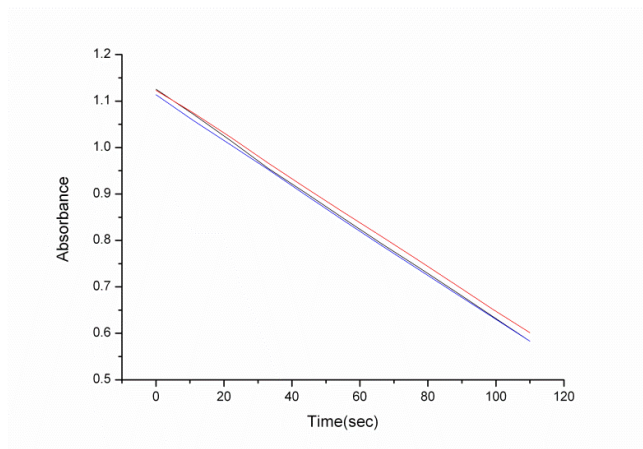

| Sr. No. | $\Delta A$ | $\Delta A/\text{min}$ | $v_0(\mu\text{M}\cdot\text{min}^{-1})$ | $v_0(\mu\text{M}\cdot\text{min}^{-1})$ |
|---------|------------|-----------------------|----------------------------------------|----------------------------------------|
| 1       | 0.054      | 0.294545              | 47.35457                               |                                        |
| 2       | 0.0484     | 0.264                 | 42.44373                               | 46.1 $\pm$ 3.2                         |
| 3       | 0.0553     | 0.301636              | 48.49459                               |                                        |



#### 4. Tables of results for the PAMPA

**Table S8** Permeability ( $P_e \times 10^{-6} \text{ cm s}^{-1}$ ) in the PAMPA-BBB assay for 13 commercial drugs, used in the Experiment Validation.

| Commercial drugs | Bibl <sup>a</sup> | PBS : EtOH (70 : 30) <sup>b</sup> |
|------------------|-------------------|-----------------------------------|
| testosterone     | 17                | $22.3 \pm 1.4$                    |
| verapamil        | 16                | $21.2 \pm 1.9$                    |
| desipramine      | 12                | $16.4 \pm 1.2$                    |
| progesterone     | 9.3               | $17.7 \pm 1.2$                    |
| promazine        | 8.8               | $14.3 \pm 0.5$                    |
| chlorpromazine   | 6.5               | $6.0 \pm 0.3$                     |
| clonidine        | 5.3               | $5.1 \pm 0.3$                     |
| piroxicam        | 2.5               | $0.24 \pm 0.01$                   |
| hydrocortisone   | 1.9               | $0.65 \pm 0.01$                   |
| lomefloxacin     | 1.1               | $0.37 \pm 0.02$                   |
| atnolol          | 0.8               | $0.78 \pm 0.02$                   |
| ofloxacin        | 0.8               | $0.37 \pm 0.02$                   |
| theophylline     | 0.1               | $0.26 \pm 0.01$                   |

<sup>a</sup> Taken from reference 4. <sup>b</sup> Data are the mean  $\pm$  SD of three independent experiments

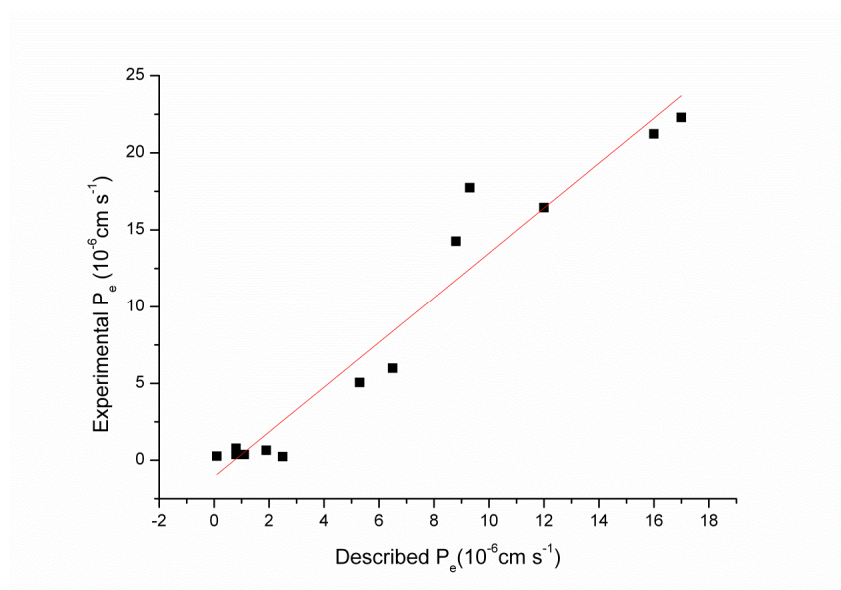

**Figure S1.** Lineal correlation between experimental and reported permeability of commercial drugs using the PAMPA-BBB assay.  $P_e (\text{exp.}) = 1.4574 P_e (\text{bibl.}) - 1.0773$  ( $R^2 = 0.9427$ )

**Table S9.** Ranges of Permeability of PAMPA-BBB Assays ( $P_e$ ,  $10^{-6}$  cm s $^{-1}$ )

---

|                                                |                   |
|------------------------------------------------|-------------------|
| Compounds of high BBB permeation (CNS+)        | $P_e > 4.7$       |
| Compounds of uncertain BBB permeation (CNS+/-) | $4.7 > P_e > 1.8$ |
| Compounds of low BBB permeation (CNS-)         | $P_e < 1.8$       |

---

## References

1. Diez, A.; Voldoire, A.; López, I.; Rubiralta, M.; Segarra, V.; Pagès, L.; Palacios, J. Synthetic applications of 2-aryl-4-piperidones. X Synthesis of 3-aminopiperidines, potential substance P antagonists. *Tetrahedron* **1995**, *51*, 5143-5156.
2. Contreras, J.-M.; Rival, Y. M.; Chayer, S.; Bourguignon, J.-J.; Wermuth, C. G. Aminopyridazines as Acetylcholinesterase Inhibitors. *J. Med Chem.* **1999**, *42*, 730-741.
3. Rodríguez-Franco, M. I.; Fernández-Bachiller, M. I.; Pérez, C.; Castro, A.; Martínez, A. Design and synthesis of N-benzylpiperidine-purine derivatives as new dual inhibitors of acetyl- and butyrylcholinesterase. *Bioorg. Med. Chem.* **2005**, *13*, 6795-6802.
4. Di, L.; Kerns, E. H.; Fan, K.; McConnell, O. J.; Carter, G. T. High throughput artificial membrane permeability assay for blood-brain barrier. *Eur. J. Med. Chem.* **2003**, *38*, 223-232.
